# Supplementary material for: Presence of Antibodies to Severe Acute Respiratory Syndrome Coronavirus-2 on Admission Is Associated With Decreased Mortality in COVID-19 Critical Illness
Source: PubMed Central journal article supplement — Crit Care Explor. 2022 Aug 29;4(9):e0754. doi: 10.1097/CCE.0000000000000754 (PMC9426803; doi:10.1097/cce.0000000000000754), 2022-08-29
Supplement: cc9-4-e0754-s001.pdf [file cc9-4-e0754-s001.pdf]

**Supplement:** Presence of antibodies to SARS-CoV-2 on admission is associated with decreased mortality in COVID-19 critical illness

**Authors:** F. Linzee Mabrey MD; Leila R. Zelnick PhD; Eric D. Morrell MD; Nicholas G. O'Connor; Andrew Hart; Mark M. Wurfel MD, PhD W. Conrad Liles MD, PhD; Pavan K. Bhatraju MD, MSc

**Contents:**

1. Supplemental Tables

**Table S1:** Intra-plate coefficient of variation (CV) by assay.

| Assay                        | %CV    |
|------------------------------|--------|
| Anti-SARS-CoV-2 Spike        | 2.77%  |
| Anti-SARS-CoV-2 Nucleocapsid | 5.05%  |
| IL-6                         | 10.18% |

%CV is the Intraplate CV

**Table S2.** Association of ICU admission Total Spike protein antibody levels and nucleocapsid antibody levels with risk of hospital mortality.

| Antibody type and classification                        | N at risk (N events) | Unadjusted HR (95% CI) | p-value | Adjusted <sup>1</sup> HR (95% CI) | p-value |
|---------------------------------------------------------|----------------------|------------------------|---------|-----------------------------------|---------|
| Absence of Spike Protein Antibodies ( $\leq 0.8$ )      | 46 (18)              | 1.0 (Ref.)             |         | 1.0 (Ref.)                        |         |
| Presence of Spike Protein Antibodies ( $> 0.8$ )        | 47 (9)               | 0.39 (0.17, 0.90)      | 0.03    | 0.40 (0.17, 0.94)                 | 0.04    |
|                                                         |                      |                        |         |                                   |         |
| Absence of Nucleocapsid antibodies ( $\leq 1.0$ )       | 48 (17)              | 1.0 (Ref.)             |         | 1.0 (Ref.)                        |         |
| Presence of Nucleocapsid Protein Antibodies ( $> 1.0$ ) | 44 (10)              | 0.47 (0.21, 1.06)      | 0.07    | 0.47 (0.21, 1.08)                 | 0.07    |

<sup>1</sup>Adjusted for age, gender, and BMI

**Table S3.** Association of dexamethasone therapy with time-to-seroconversion, among those with absence of Anti-Spike antibodies on ICU admission.

| Dexamethasone* | N at risk (N events) | Unadjusted HR (95% CI) | p-value | Adjusted <sup>1</sup> HR (95% CI) | p-value |
|----------------|----------------------|------------------------|---------|-----------------------------------|---------|
| No             | 9 (3)                | 1.0 (Ref.)             |         | 1.0 (Ref.)                        |         |
| Yes            | 12 (11)              | 2.59 (0.78, 8.62)      | 0.12    | 2.42 (0.57, 10.37)                | 0.23    |

<sup>1</sup>Adjusted for age, gender, and BMI

Time to seroconversion defined as difference from date of first PCR to date of first positive anti-Spike antibody test, censored at the date of final sample in those who were discharged or died.

\*Excludes participants receiving convalescent plasma upon ICU admission.
